# Supplementary material for: Melting-assisted solvent-free synthesis of hierarchical SAPO-34 with enhanced methanol to olefins (MTO) performance
Source: Royal Society of Chemistry journal article supplement (doi:10.1039/c7cy02283b), 2018-01-01
Supplement: c7cy02283b1.pdf [file c7cy02283b1.pdf]

## Melting-assisted solvent-free synthesis of hierarchical SAPO-34 with enhanced methanol to olefins (MTO) performance

Ziyu Liu<sup>a</sup>, Shu Ren<sup>a</sup>, Xing Yu<sup>a,c</sup>, Xinqing Chen<sup>a,\*</sup>, Gang Wang<sup>a</sup>, Xian Wu<sup>a,c</sup>, Gan Yu<sup>a,b</sup>, Minghuang Qiu<sup>a</sup>, Chengguang Yang<sup>a</sup>, and Yuhan Sun<sup>a,b,\*</sup>

<sup>a</sup> CAS Key Laboratory of Low-carbon Conversion Science and Engineering, Shanghai Advanced Research Institute, Chinese Academy of Science, Shanghai, 201202, China. <sup>b</sup>ShanghaiTech University, Shanghai, 201210, China. <sup>c</sup>Shanghai University, Shanghai 200444, China. <sup>d</sup>Shanghai University, Shanghai 200444, China

\*Corresponding authors: chenxq@sari.ac.cn; sunyh@sari.ac.cn; Fax: +86 21 20350958; Tel: +86 21 20350958

### Supporting information:

#### Materials:

SAPO-34 was hydrothermally synthesized from the gel with a composition of  $1\text{Al}_2\text{O}_3:0.44\text{SiO}_2:1.1\text{P}_2\text{O}_5:2.25\text{TEA}:35\text{H}_2\text{O}$ . Pseudoboehmite, phosphoric acid (85 wt%) and silica sol (40 wt%) were used as the sources of aluminum, phosphorus and silicon, respectively. Phosphoric acid was added to the pseudoboehmite and silica sol solution, which was then stirred for 1 h until a uniform gel was obtained. To the resultant, triethylamine (TEA) and SAPO-34 crystal seeds were successively added, and the stirring was maintained for 1h to form a uniform reaction mixture, which was then sealed in a 120 ml autoclave and heated from room temperature to 165°C within 420min, then kept for 33 h. Finally, the crystal was calcined in 600°C for 5 h in order to remove the template agents named as SP34. Post-synthesis treatment of as-synthesized SAPO-34 was carried out at 100°C for 6 h with solid-state oxalic acid and designated as SP34-x (x is the percentage of oxalic acid, 2%, 3%, 5%, 10%). In addition, the SP34-5% was treated at different temperature (80°C-140°C), and these samples were noted as SP34-80, SP34-100, SP34-120, SP34-140 respectively.

#### Characterizations

The crystallinity and phase purity of the samples were characterized by powder X-ray diffraction on a Bruker AXS D8 diffractometer using Cu K $\alpha$  radiation ( $\lambda=1.5418\text{ \AA}$ ). The crystal size and morphology was observed with a high resolution scanning electron microscopy (SEM) on a JSM-6700F electron microscope (JEOL, Japan). Low-temperature nitrogen adsorption isotherms were carried out on a Micromeritics 2020 analyzer at -196°C after

activation in vacuum at 300°C for 6 h. Surface Area ( $S_{\text{BET}}$ ) and micropore volume ( $V_{\text{micro}}$ ) were determined by applying the BET and t-plot methods, respectively. Pore size distribution and volume of mesopores ( $V_{\text{meso}}$ ) were obtained by applying the BJH model to the adsorption branch of the isotherm. Mercury penetration measurements were conducted on a Micromeritics AutoPore IV 9500. The solid-state MAS NMR experiments were performed on a Bruker AVANCE III 400 WB spectrometer. Chemical compositions were determined with X-ray fluorescence (XRF) analysis carried out on an AXIOS with Rh radiation.

Thermogravimetric (TG) analysis was performed on NETZSCH STA 449 F3 instrument in air at a heating rate of 10°C/min from room temperature to 1000°C.  $\text{NH}_3$ -TPD analysis was carried out on an automated chemisorption analyzer (TP-5080) from 100 to 600°C with a temperature increase of 10°C/min.

#### **Catalytic Test: Methanol to Olefin Reaction (MTO)**

The catalytic tests of MTO reactions were performed in a quartz tubular fixed-bed steel reactor with a length of 50 cm and an inner diameter of 10 mm under atmospheric pressure. A 3.0 g (20–40 mesh) of prepared catalyst was loaded in the center of quartz reactor. The samples were pretreated under an air flow of 10 mL/min for 1 h after the temperature of reactor reached 400°C in order to activate the catalyst, and then methanol was pumped in the reactor with a WHSV of 1 h<sup>-1</sup>. The analysis of the reaction products was performed by using an off-line gas chromatograph (GC-2014C) equipped with a flame ionization detector (FID) and a thermal conductivity detector (TCD). The conversion and selectivity were calculated on  $\text{CH}_2$  basis and dimethyl ether (DME) was considered as the reactant in the calculation.

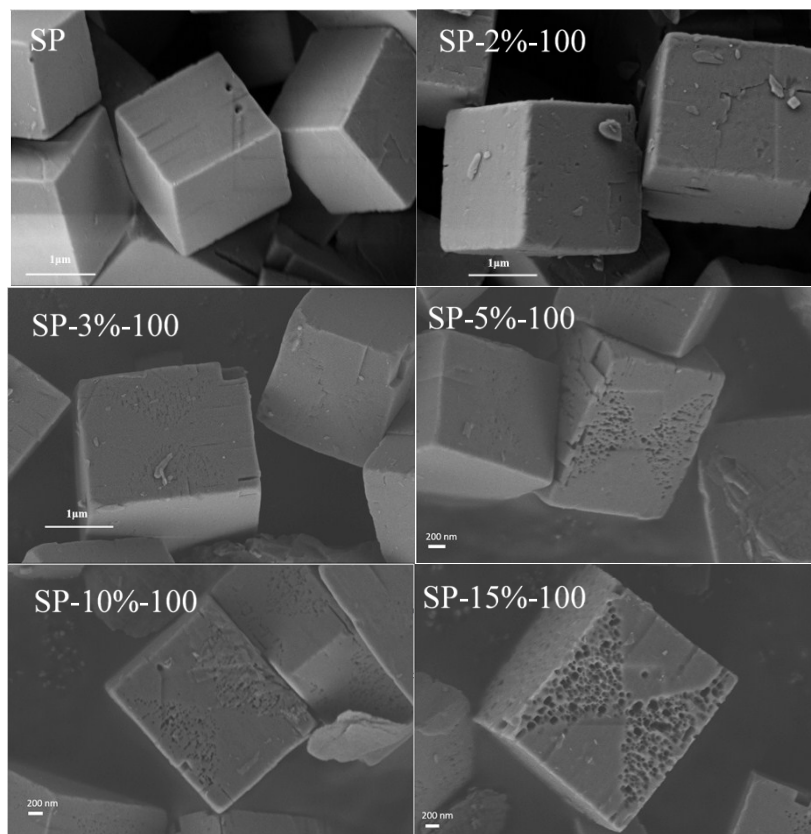

Figure S1. SEM images of SP34 and SP34-x samples.

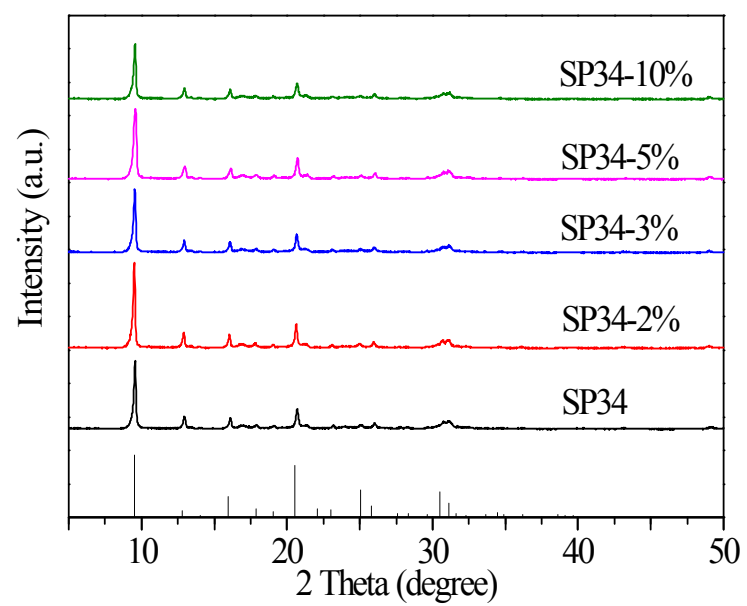

Figure S2. XRD patterns of SP34 and SP34-x samples

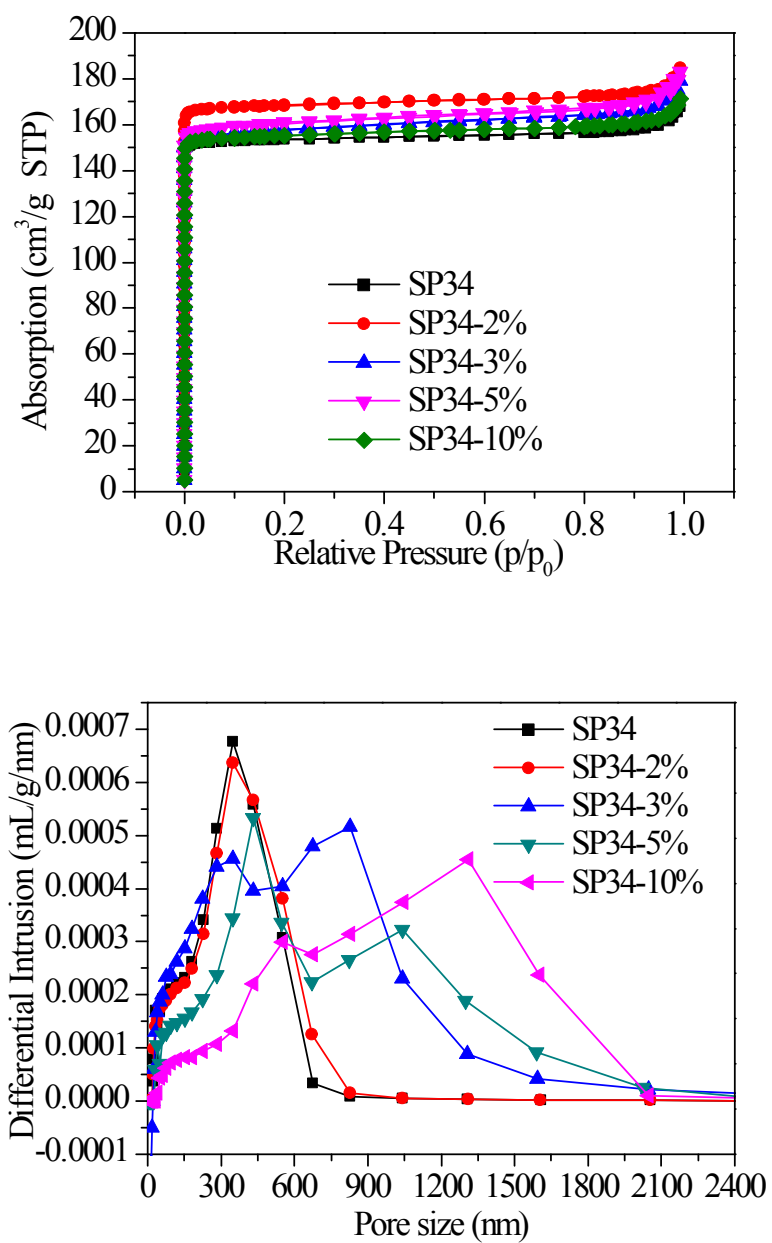

Figure S3.  $N_2$  adsorption-desorption isotherms and pore size distribution (PSD) of SP34 and SP34-x

samples

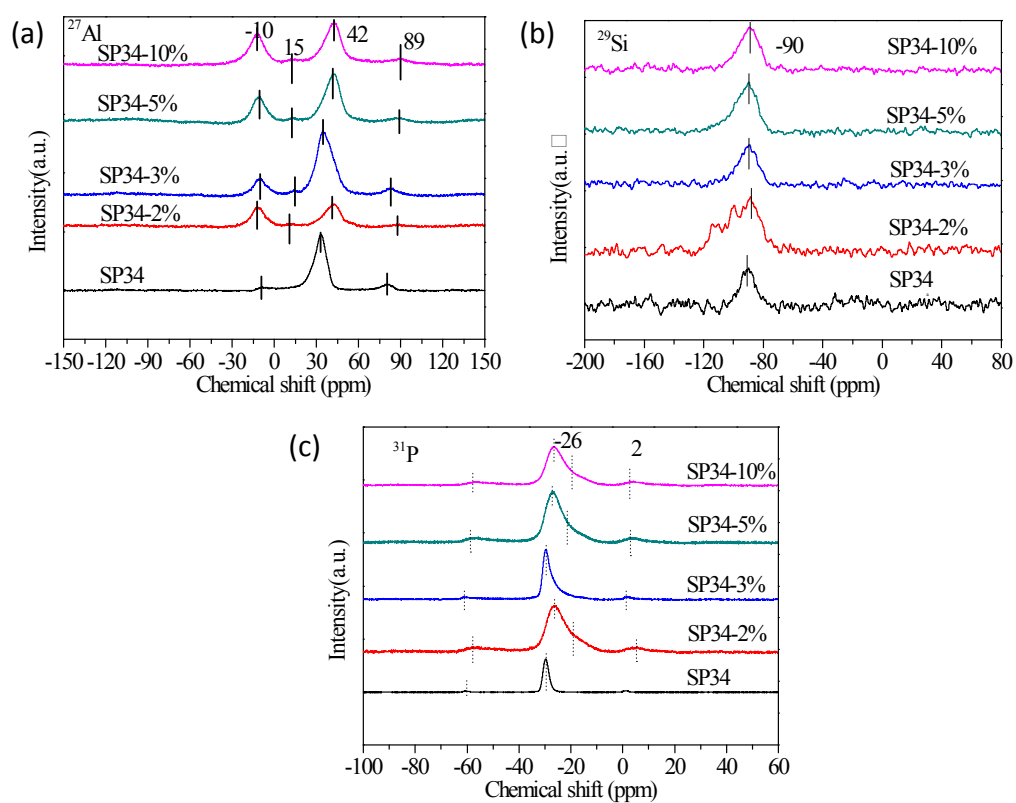

Figure S4. (a)  $^{27}\text{Al}$ , (b)  $^{29}\text{Si}$ , (c)  $^{31}\text{P}$  MAS NMR spectra of SP34 and SP34-x samples.

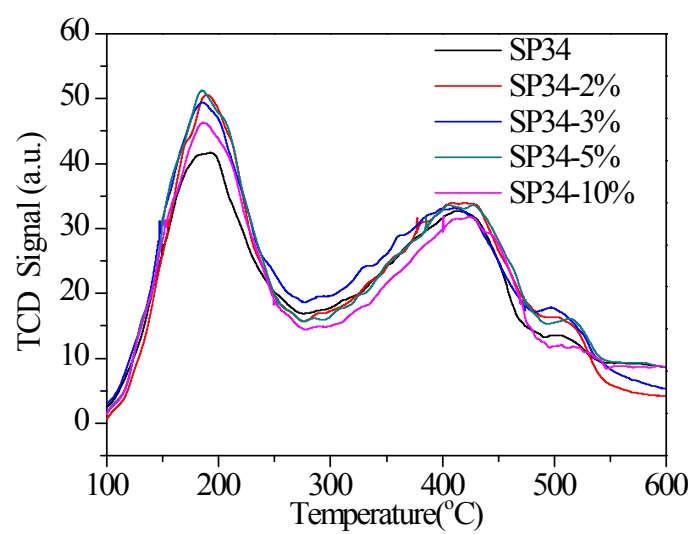

Figure S5.  $\text{NH}_3$ -TPD of SP34 and SP34-x samples.

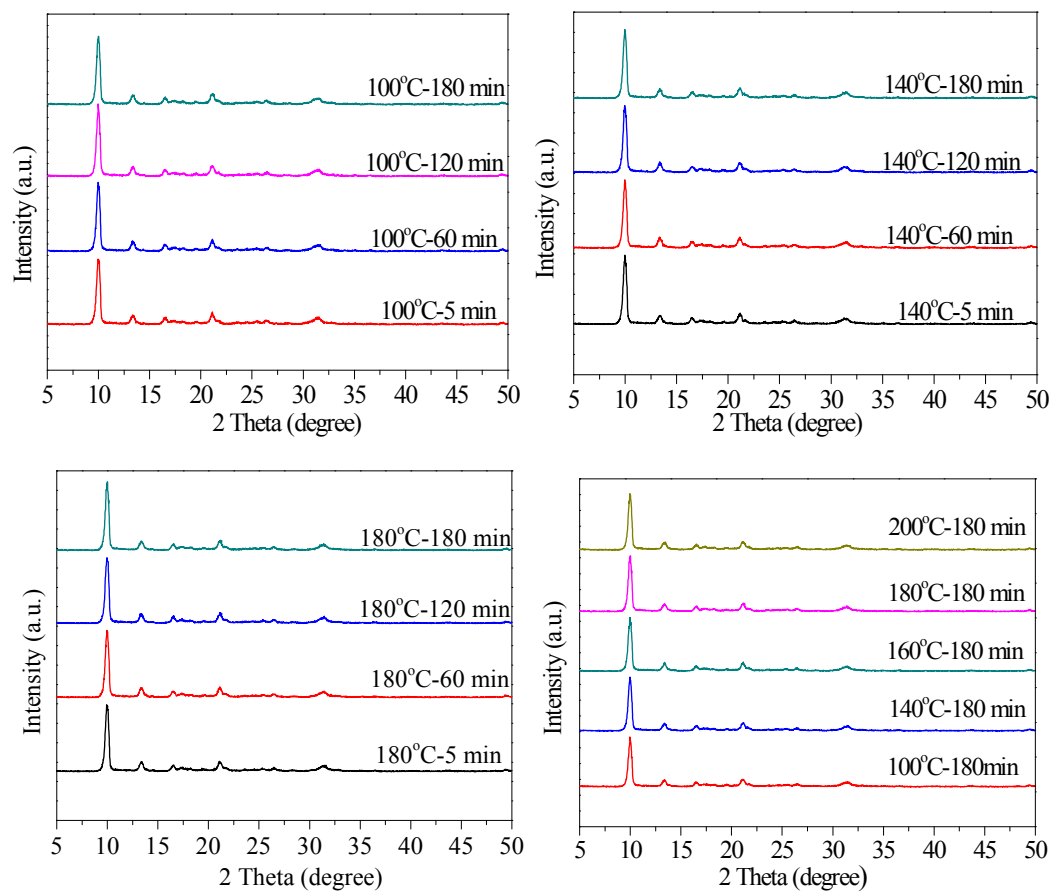

Figure S6. In-situ XRD patterns of SP34-5% sample at different treating temperatures.



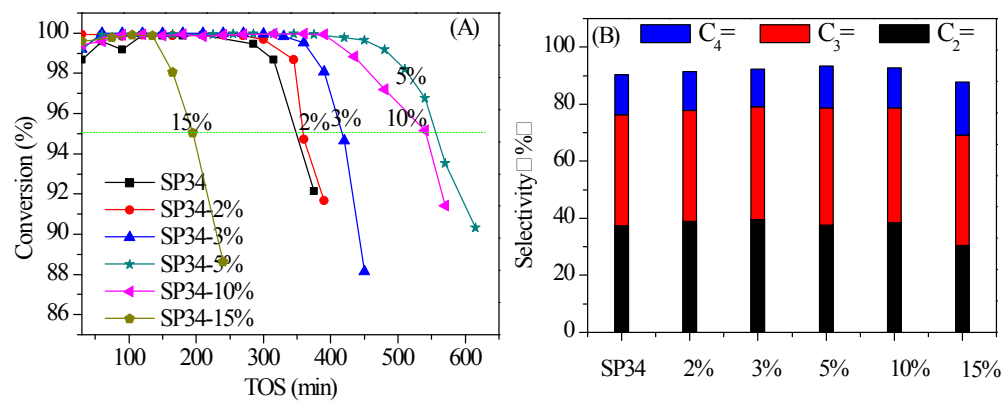

Figure S7. (A) Catalytic conversion of methanol and (B) light olefins selectivity of SP34 and SP34-x samples for MTO reaction at 400°C with WHSV of 1 h<sup>-1</sup> at atmospheric pressure.

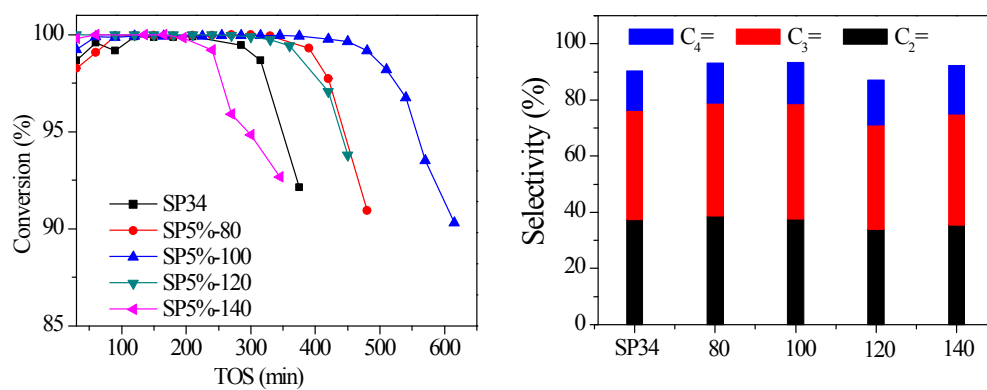

Figure S8 (A) Catalytic conversion of methanol and (B) light olefins selectivity of SP34 and SP34-5% samples after treating at different temperatures, for MTO reaction at 400°C with WHSV of 1 h<sup>-1</sup> at atmospheric pressure.

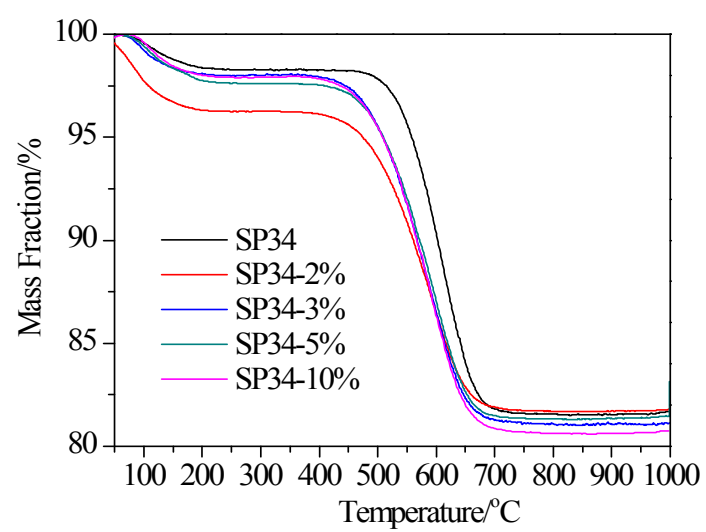

Figure S9. TG analysis of SP34 and SP34-x samples

Table S1. Textural properties of the prepared SP34 and SP34-x samples.

| Samples  | $S_{\text{BET}}$<br>( $\text{m}^2\text{g}^{-1}$ ) | $S_{\text{micro}}$<br>( $\text{m}^2\text{ g}^{-1}$ ) | $V_{\text{micro}}$<br>( $\text{cm}^3\text{ g}^{-1}$ ) | $V_{\text{meso}}$<br>( $\text{cm}^3\text{ g}^{-1}$ ) |
|----------|---------------------------------------------------|------------------------------------------------------|-------------------------------------------------------|------------------------------------------------------|
| SP34     | 625                                               | 610                                                  | 0.23                                                  | 0.01                                                 |
| SP34-2%  | 712                                               | 704                                                  | 0.26                                                  | 0.02                                                 |
| SP34-3%  | 667                                               | 657                                                  | 0.24                                                  | 0.02                                                 |
| SP34-5%  | 673                                               | 658                                                  | 0.24                                                  | 0.03                                                 |
| SP34-10% | 656                                               | 647                                                  | 0.24                                                  | 0.02                                                 |

Table S2. The life time and coking formation rate of SP34 and SP34-x samples

| Samples                                                | SP34  | SP-2% | SP-3% | SP-5% | SP-10% |
|--------------------------------------------------------|-------|-------|-------|-------|--------|
| TOS (min)                                              | 340   | 360   | 430   | 580   | 540    |
| Coke (% $\cdot$ g/g <sub>cat</sub> )                   | 16.58 | 14.50 | 16.63 | 16.50 | 16.00  |
| R <sub>coke</sub> (mg/(min $\cdot$ g <sub>cat</sub> )) | 0.49  | 0.40  | 0.39  | 0.28  | 0.30   |
| P <sub>coke</sub> (g/g <sub>MeOH</sub> )               | 0.029 | 0.024 | 0.023 | 0.017 | 0.018  |

R<sub>coke</sub> (g/(min $\cdot$ g<sub>cat</sub>))=Coke amount (g)/reaction time (min). P<sub>coke</sub> (g/g<sub>cat</sub>)=Coke amount (g)/methanol feedstock (g)

Table S3. The distributions of coking species on spent catalysts analyzed by GC-MS.

| The main coke species                   | Retention time (min) | SP34  | SP34-2% | SP34-3% | SP34-5% | SP34-10% |
|-----------------------------------------|----------------------|-------|---------|---------|---------|----------|
| Benzene homologues                      | 4.0-13.9             | 4.1%  | 5.2%    | 9.51%   | 9.8%    | 12.1%    |
| Naphthalene and indene derivatives      | 14.0-20.7            | 13.7% | 21.0%   | 26.94%  | 28.3%   | 29.9%    |
| Phenanthrene and anthracene derivatives | 20.8-24.2            | 33.2% | 40.2%   | 39.5%   | 35.7%   | 38.5%    |
| Pyrene and Benzanthracene ect.          | >24.2                | 49.0% | 33.7%   | 24.0%   | 26.3%   | 19.4%    |
